# Supplementary material
Source: HighWire-hosted journal article supplement (https://bmjopen.bmj.com/content/13/12/e074942)
Supplement: inline-supplementary-material-1 [file inline-supplementary-material-1.pdf]

**What do older people who have attempted suicide experience? study protocol for a qualitative meta-synthesis among older adults, family caregivers and health care professionals**

**Appendix 2 Abstract Selection form**

| Time stamp | Author and date | Title | Is this a qualitative study? | Does the study present evidence of the stakeholders (older adults, family caregivers and health care professionals)? | Does the study express the stakeholders' understanding of older adults' attempted suicide experience? | Initials of screener |
|------------|-----------------|-------|------------------------------|----------------------------------------------------------------------------------------------------------------------|-------------------------------------------------------------------------------------------------------|----------------------|
|            |                 |       |                              |                                                                                                                      |                                                                                                       |                      |
|            |                 |       |                              |                                                                                                                      |                                                                                                       |                      |
|            |                 |       |                              |                                                                                                                      |                                                                                                       |                      |
|            |                 |       |                              |                                                                                                                      |                                                                                                       |                      |
