# Supplementary material
Source: HighWire-hosted journal article supplement (https://bmjopen.bmj.com/content/13/12/e074942)
Supplement: inline-supplementary-material-2 [file inline-supplementary-material-2.pdf]

**What do older people who have attempted suicide experience? study protocol for a qualitative meta-synthesis among older adults, family caregivers and health care professionals**

**Appendix 1**

| Database          | Total studies |
|-------------------|---------------|
| 1.PubMed          |               |
| 2.Embase          |               |
| 3.Cochane library |               |
| 4. Web of science |               |
| 5.CINAHL          |               |
