# Supplementary material
Source: HighWire-hosted journal article supplement (https://bmjopen.bmj.com/content/13/12/e074942)
Supplement: inline-supplementary-material-3 [file inline-supplementary-material-3.pdf]

**What do older people who have attempted suicide experience? study protocol for a qualitative meta-synthesis among stakeholders****Appendix 3: Full Article Screening Form**

| Author<br>Date | Title | Is this a<br>qualitative<br>study? | Does the study present<br>evidence of the<br>prescription of the<br>registered nurse? | Does the study<br>express the nurses'<br>understanding of<br>prescription? | Initials of the<br>screner |
|----------------|-------|------------------------------------|---------------------------------------------------------------------------------------|----------------------------------------------------------------------------|----------------------------|
|                |       |                                    |                                                                                       |                                                                            |                            |
|                |       |                                    |                                                                                       |                                                                            |                            |
|                |       |                                    |                                                                                       |                                                                            |                            |
|                |       |                                    |                                                                                       |                                                                            |                            |
