# Supplementary material
Source: HighWire-hosted journal article supplement (https://bmjopen.bmj.com/content/13/12/e074942)
Supplement: inline-supplementary-material-5 [file inline-supplementary-material-5.pdf]

**What do older people who have attempted suicide experience? study protocol for a qualitative meta-synthesis among stakeholders**  
**Appendix 5: Data Extraction Tool**

**QARI data extraction instrument**

**JBI QARI Data Extraction Form for Interpretive & Critical Research**

Reviewer .....

Date .....

Author .....

Year .....

Journal .....

Record Number .....

**Study Description**

Methodology \_\_\_\_\_

Method \_\_\_\_\_

Phenomena of interest \_\_\_\_\_

Setting \_\_\_\_\_

Geographical \_\_\_\_\_

Cultural \_\_\_\_\_

Participants \_\_\_\_\_

Date analysis \_\_\_\_\_

Authors Conclusions \_\_\_\_\_

Comments \_\_\_\_\_

Complete  Yes  No

| Findings | Illustration from Publication (Page number ) | Evidence    |          |             |
|----------|----------------------------------------------|-------------|----------|-------------|
|          |                                              | Unequivocal | Credible | Unsupported |
|          |                                              |             |          |             |
|          |                                              |             |          |             |
|          |                                              |             |          |             |
|          |                                              |             |          |             |

Extraction of findings complete  Yes  No

| Author, Date | Country | Title | Study aim | Study Design | Study setting | Study Population | Inclusion and exclusion criteria | Findings |
|--------------|---------|-------|-----------|--------------|---------------|------------------|----------------------------------|----------|
|              |         |       |           |              |               |                  |                                  |          |
|              |         |       |           |              |               |                  |                                  |          |
|              |         |       |           |              |               |                  |                                  |          |
